# Supplementary material for: Analysis of Expression of Programmed Cell Death Ligand 1 (PD-L1) and BRAFV600E Mutation in Thyroid Cancer
Source: MDPI journal article supplement (doi:10.3390/cancers15133449), 2023-06-30
Supplement: s1 [file s1]

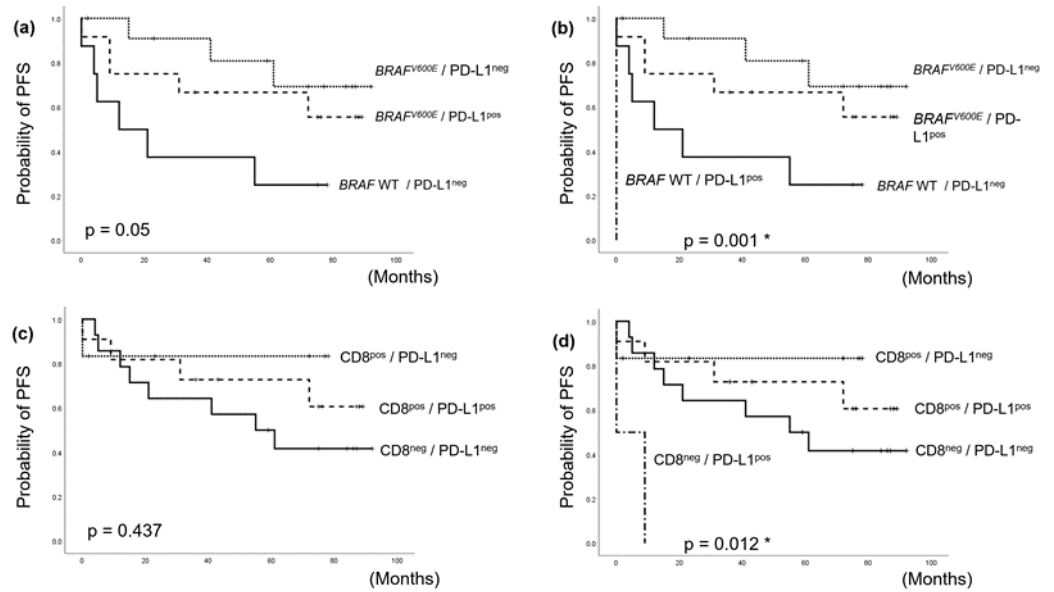

**Figure S1.** Kaplan-Meier curves for PFS; (a) (b) with *BRAF*<sup>V600E</sup> mutation or wild type and negative or positive PD-L1 expression and (c) (d) with negative or positive CD8 + expression and negative or positive PD-L1 expression. P values were calculated by the log- rank test. *BRAF* wild type and PD-L1 positive group (n=1) was excluded from analysis due to small sample. *BRAF*<sup>V600E</sup>, PD-L1 negative vs. PD-L1 positive;  $\chi^2=0.673$ ,  $p=0.412$ . PD-L1 negative, *BRAF*<sup>V600E</sup> mutation vs. *BRAF* wild type;  $\chi^2=5.615$ ,  $p=0.018$  (a). CD8 + negative/ PD-L1 positive group (n=2) was excluded from analysis. CD8+ positive, PD-L1 negative vs. PD-L1 positive;  $\chi^2=0.317$ ,  $p=0.573$ . PD-L1 negative, CD8+ positive vs. CD8+ negative;  $\chi^2=1.140$ ,  $p=0.286$  (c).

**Table S1.** Results summary

| Results                                                                                                                                           | Data details                                                                                                                                                                                          |
|---------------------------------------------------------------------------------------------------------------------------------------------------|-------------------------------------------------------------------------------------------------------------------------------------------------------------------------------------------------------|
| <b>Table 1. Correlations between PD-L1 expression and clinicopathological factors in thyroid cancer.</b>                                          |                                                                                                                                                                                                       |
| 1. The present findings indicate the rate of PD-L1 positive expression and clinicopathologic factors which were associated with PD-L1 expression. | With a PD-L1 staining cut-off value of 1%, 13 (39.4%) of 33 patients were classified as positive.<br>PD-L1 positive was positively associated with low stimulation Index (SI) levels ( $p = 0.046$ ). |
| 2. <i>BRAF</i> <sup>V600E</sup> mutation was significantly associated with increasing expression of PD-L1.                                        | 12 (50%) of 24 patients with <i>BRAF</i> <sup>V600E</sup> mutation were PD-L1 positive, compared to one (11.1%) of nine patients with <i>BRAF</i> wild type ( $p = 0.047$ ).                          |
| 3. CD8+ expression was significantly associated with increased PD-L1 expression.                                                                  | Of the 17 patients with CD8+ positive, 11 (64.7%) were PD-L1 positive, compared to six (35.3%) CD8+ negative patients ( $p = 0.003$ ).                                                                |

**Table 2. Univariate analysis of clinicopathological factors associated with PFS.**

|                                                                                                                                                                                 |                                                                                                                                                                                                                                                                                                                                                                                                                                                                                                                                                                                                                                                                                                                          |
|---------------------------------------------------------------------------------------------------------------------------------------------------------------------------------|--------------------------------------------------------------------------------------------------------------------------------------------------------------------------------------------------------------------------------------------------------------------------------------------------------------------------------------------------------------------------------------------------------------------------------------------------------------------------------------------------------------------------------------------------------------------------------------------------------------------------------------------------------------------------------------------------------------------------|
| The results of the univariate analysis revealed that 9 variables which were considered significantly associated with poor PFS.<br>PD-L1 expression was not associated with PFS. | 9 variables which were considered significantly associated with poor PFS were,<br><ul style="list-style-type: none"> <li>• <i>BRAF</i> wild type (HR = 0.27 [CI 0.10–0.76], <math>p = 0.013</math>),</li> <li>• high CRP (HR = 5.08 [CI 1.26–64.76], <math>p = 0.002</math>),</li> <li>• high WBC (HR = 30.93 [CI 2.81–340.82], <math>p = 0.005</math>),</li> <li>• high VEGF (HR = 9.02 [CI 1.559–6.383], <math>p = 0.029</math>),</li> <li>• primary tumor size <math>\geq 20</math>mm (HR = 7.79 [CI 1.74–34.78], <math>p = 0.007</math>),</li> <li>• pT4 (HR = 8.12 [CI 2.07–31.86], <math>p=0.003</math>),</li> <li>• extrathyroidal extension (Ex) 2 (HR = 9.3 [CI 2.28–37.9], <math>p = 0.002</math>),</li> </ul> |
|---------------------------------------------------------------------------------------------------------------------------------------------------------------------------------|--------------------------------------------------------------------------------------------------------------------------------------------------------------------------------------------------------------------------------------------------------------------------------------------------------------------------------------------------------------------------------------------------------------------------------------------------------------------------------------------------------------------------------------------------------------------------------------------------------------------------------------------------------------------------------------------------------------------------|

|  |                                                                                                                                                                                              |
|--|----------------------------------------------------------------------------------------------------------------------------------------------------------------------------------------------|
|  | <ul style="list-style-type: none"> <li>• metastasis (M)1 (HR = 5.73 [CI 1.98–16.58], p = 0.001), and</li> <li>• anaplastic thyroid cancer (HR = 4.97 [CI 1.53–16.18], p = 0.008).</li> </ul> |
|--|----------------------------------------------------------------------------------------------------------------------------------------------------------------------------------------------|

**Table3. Multivariate analysis of clinicopathological factors associated with PFS.**

|                                                                                                                                                      |                                                                                                                              |
|------------------------------------------------------------------------------------------------------------------------------------------------------|------------------------------------------------------------------------------------------------------------------------------|
| In the multivariate analysis, patients with the <i>BRAF</i> wild type tended to have poor prognosis than with <i>BRAF</i> <sup>V600E</sup> mutation. | <i>BRAF</i> wild type (p = 0.022) and high CRP (p = 0.039) were independent and significant predictive factors for poor PFS. |
|------------------------------------------------------------------------------------------------------------------------------------------------------|------------------------------------------------------------------------------------------------------------------------------|

**Figure 3 and Supplementary Figure S1. Kaplan-Meier estimation of PFS with negative or positive PD-L1 expression, with *BRAF*<sup>V600E</sup> mutation or wild type, and with negative or positive CD8+ expression.**

|                                                                                                                                                                                                |                                                                                         |
|------------------------------------------------------------------------------------------------------------------------------------------------------------------------------------------------|-----------------------------------------------------------------------------------------|
| Patients with <i>BRAF</i> <sup>V600E</sup> mutation had a significantly longer survival than with <i>BRAF</i> wild type. Moreover, CD8+ negative patients might tend to have a poor prognosis. | <i>BRAF</i> wild type patients were significantly associated with poor PFS (p = 0.007). |
|------------------------------------------------------------------------------------------------------------------------------------------------------------------------------------------------|-----------------------------------------------------------------------------------------|

\*SI, Stimulation Index is one of the markers of inflammation; VEGF, vascular endothelial growth factor; BRAF, v-raf murine sarcoma viral oncogene homolog B1; PFS, progression-free survival.
